# Supplementary material
Source: publisher figshare collection journal article supplement (https://sage.figshare.com/ndownloader/files/17513309)
Supplement: Supplementary file 1 [file 17513309]

# Fan Therapy for the relief of dyspnea in malignant and non-malignant diseases in adults (Review)

*Jun Kako, Masamitsu Kobayashi, Yasufumi Oosono, Kohei Kajiwara, Mika Miyashita*

## Citation

Jun Kako, Masamitsu Kobayashi, Yasufumi Oosono, Kohei Kajiwara, Mika Miyashita. Fan Therapy for the relief of dyspnea in malignant and non-malignant diseases in adults (Review). PROSPERO 2018 CRD42018108610 Available from:

[https://www.crd.york.ac.uk/prospERO/display\\_record.php?ID=CRD42018108610](https://www.crd.york.ac.uk/prospERO/display_record.php?ID=CRD42018108610)

## Review question

To assess the effectiveness of fan therapy on dyspnea in patients with malignant and non-malignant disease.

## Searches

We will search the following electrical databases from 1987 to 22 August 2018.

? Cochrane Central Register of Controlled Trials (CENTRAL) in the Cochrane Library

? MEDLINE (EBSCO)

? CINAHL (EBSCO)

? Scopus

## Types of study to be included

We will include randomized controlled trials.

## Condition or domain being studied

Fan therapy for dyspnea in malignant and non-malignant patients.

## Participants/population

We will include the studies if the participants meet the following criteria.

? Patients with adults (aged ?18 years)

? Patients with dyspnea

? Patients with malignant or non-malignant disease

We will exclude the following studies.

? Complex intervention

? Long term intervention

## Intervention(s), exposure(s)

Fan therapy for dyspnea, uses a fan to blow air in the direction of the patient's face.

## Comparator(s)/control

Fan uses a fan to blow air in the direction of the patient's face, no fan or other treatment without medication.

## Context

## Main outcome(s)

Primary outcome is change in dyspnea intensity measured by self-reported instruments (e.g. Numerical Rating Scale (NRS), Visual Analogue Scale (VAS) or modified Borg Scale (mBS)). Other terms for dyspnea such as breathlessness and shortness of breath will also be accepted.

### Additional outcome(s)

None.

### Data extraction (selection and coding)

Three review authors independently assessed the titles and abstracts of all the studies. Independent review authors will eliminate studies that clearly do not satisfy inclusion criteria. Then, we will obtain full-texts of remaining studies. The three review authors will read these studies independently to select relevant studies.

### Risk of bias (quality) assessment

We will independently assess the methodological quality of randomized controlled trials using the Cochrane Collaboration's risk of bias tool, which consist of six items: sequence generation; allocation concealment; blinding of participants, personnel, and outcome assessors; incomplete outcome data; selective reporting; and other potential threats to validity. Each item is judged as being either "high risk", "low risk" or "unclear" risk of bias. And, we used a Jadad scale to evaluate the quality of the randomized controlled trials.

### Strategy for data synthesis

We will analyze the results of the studies within the giving intervention category assessing the same outcome by conducting a meta-analysis using the RevMan 5.3.

### Analysis of subgroups or subsets

None planned.

### Contact details for further information

Jun Kako  
jkako-tky@umin.ac.jp

### Organisational affiliation of the review

Hiroshima University

### Review team members and their organisational affiliations

Mr Jun Kako. Hiroshima University  
Mr Masamitsu Kobayashi. Ministry of Defense National Defense Medical College  
Mr Yasufumi Oosono. Ministry of Defense National Defense Medical College  
Mr Kohei Kajiwar. Hiroshima University  
Mika Miyashita. Hiroshima University

### Type and method of review

Intervention, Meta-analysis, Systematic review

### Anticipated or actual start date

21 August 2018

### Anticipated completion date

31 December 2019

### Funding sources/sponsors

None.

### Conflicts of interest

### Language

English

### Country

Japan

### Stage of review

Review Ongoing

### Subject index terms status

Subject indexing assigned by CRD

### Subject index terms

Adult; Dyspnea; Humans; Palliative Care

### Date of registration in PROSPERO

17 September 2018

### Date of publication of this version

17 September 2018

### Details of any existing review of the same topic by the same authors

### Stage of review at time of this submission

| Stage                                                           | Started | Completed |
|-----------------------------------------------------------------|---------|-----------|
| Preliminary searches                                            | Yes     | Yes       |
| Piloting of the study selection process                         | Yes     | Yes       |
| Formal screening of search results against eligibility criteria | Yes     | Yes       |
| Data extraction                                                 | Yes     | No        |
| Risk of bias (quality) assessment                               | No      | No        |
| Data analysis                                                   | No      | No        |

### Versions

17 September 2018

### PROSPERO

This information has been provided by the named contact for this review. CRD has accepted this information in good faith and registered the review in PROSPERO. The registrant confirms that the information supplied for this submission is accurate and complete. CRD bears no responsibility or liability for the content of this registration record, any associated files or external websites.
